# Supplementary material for: Ethylene tri-/tetramerization catalysts supported by diphosphinothiophene ligands
Source: Royal Society of Chemistry journal article supplement (doi:10.1039/c7dt01060e), 2017-01-01
Supplement: c7dt01060e1.pdf [file c7dt01060e1.pdf]

**Electronic Supplementary Information for**  
**Ethylene Tri-/Tetramerization Catalysts Supported by**  
**Diphosphinothiophene Ligands**

Chengye Zhang, Liubing Song, Hongfei Wu, Xiaoyu Ji, Jiajun Jiao, and Jun Zhang\*

**NMR Spectra:**

**<sup>1</sup>H NMR Spectrum of Ligand L<sup>4</sup>**

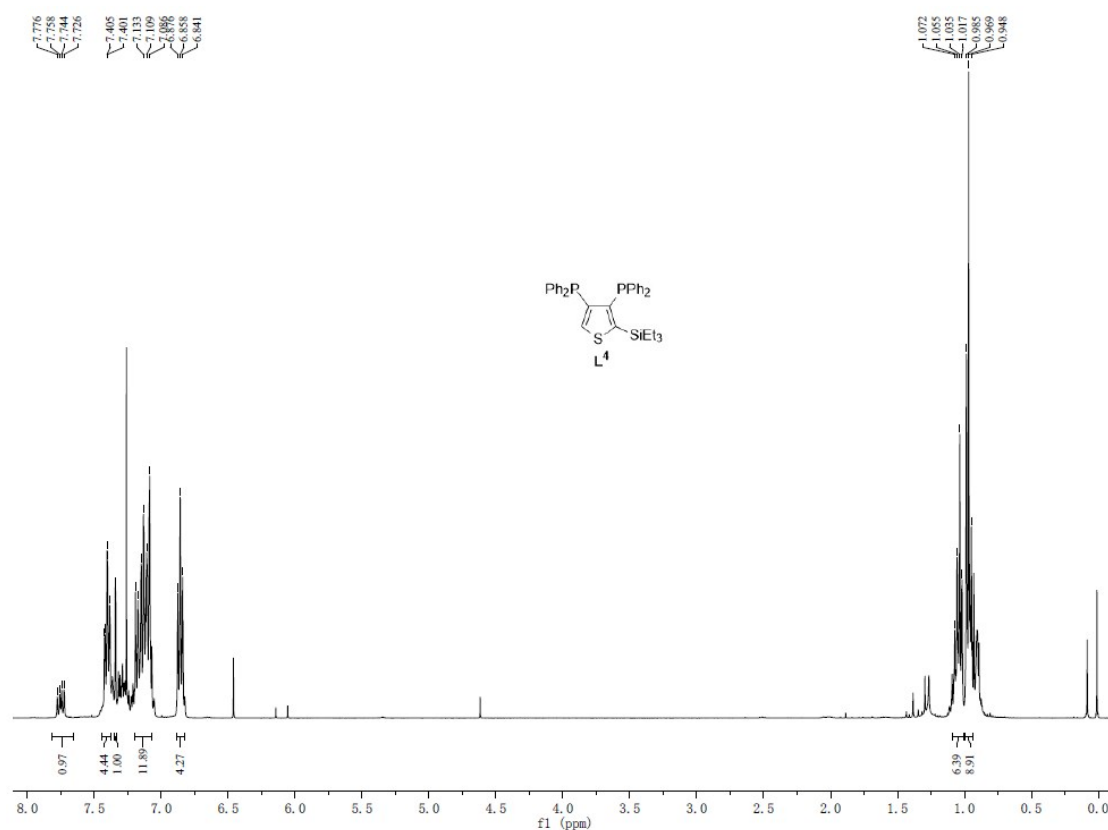

### $^{13}\text{C}$ NMR Spectrum of Ligand $\text{L}^4$

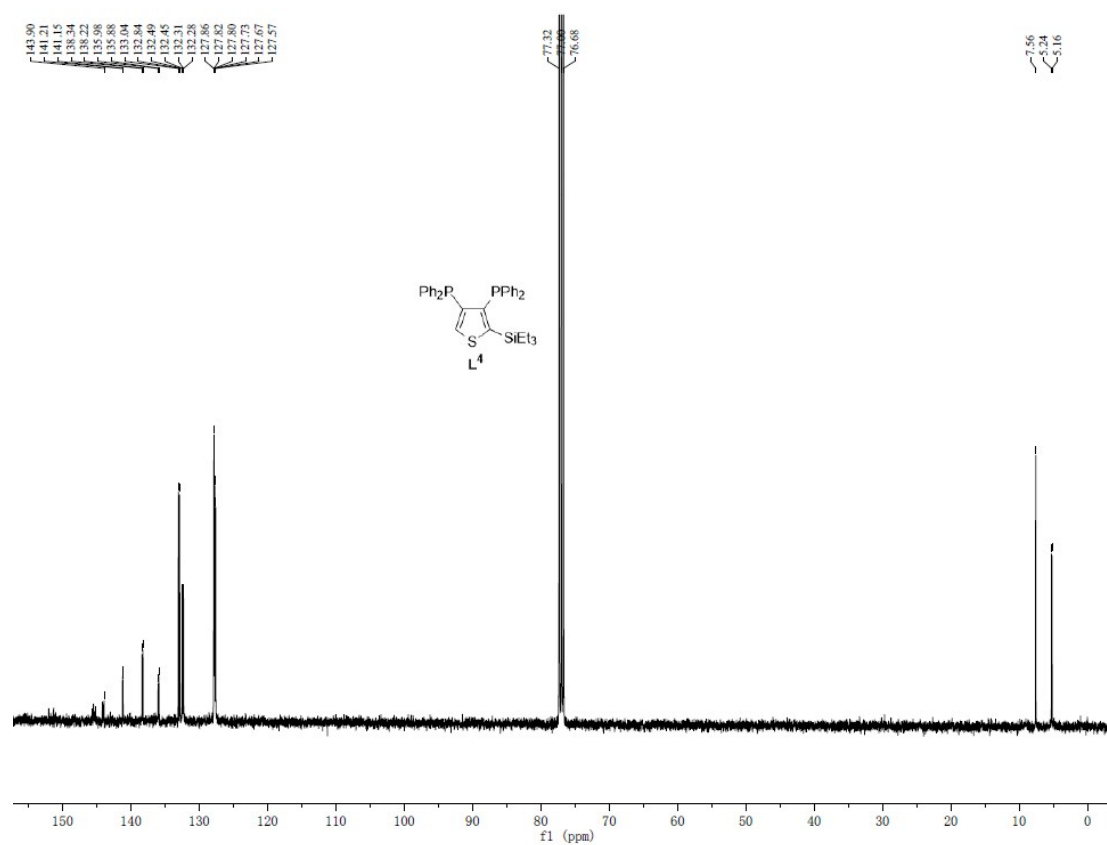

### $^{31}\text{P}$ NMR Spectrum of Ligand $\text{L}^4$

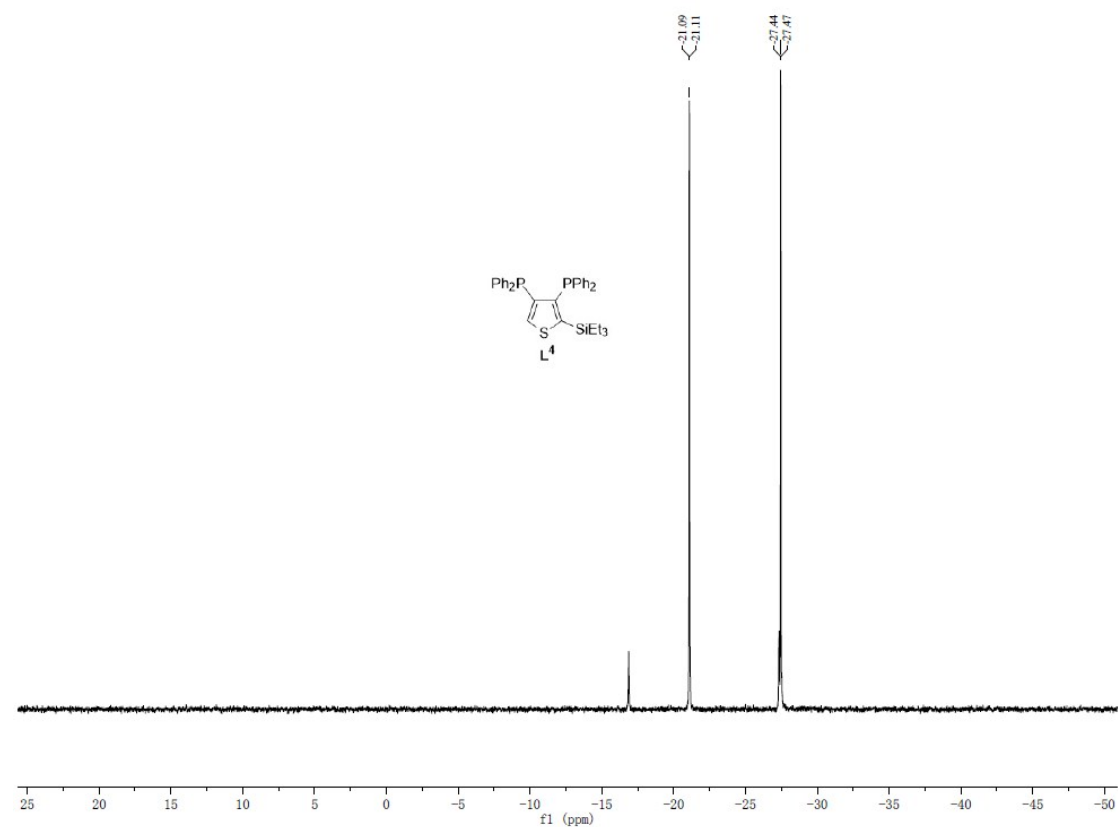

### <sup>1</sup>H NMR Spectrum of Ligand L<sup>5</sup>

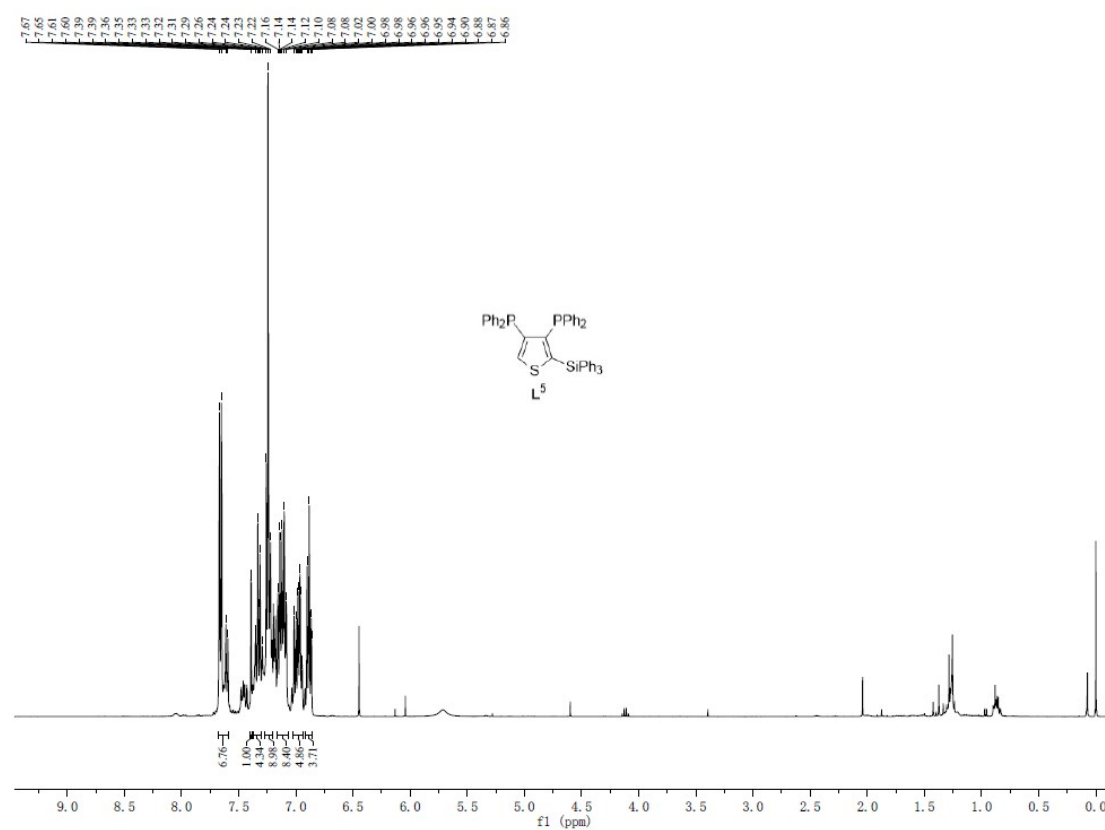

### <sup>13</sup>C NMR Spectrum of Ligand L<sup>5</sup>

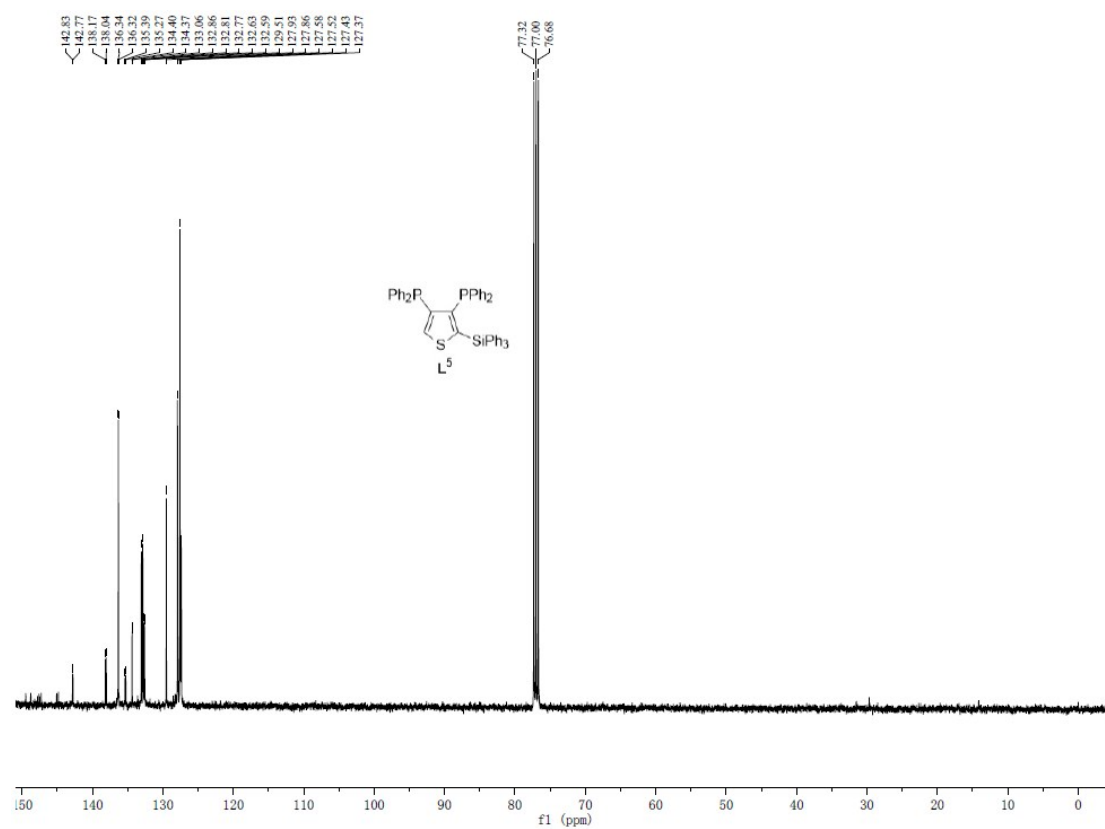

# <sup>31</sup>P NMR Spectrum of Ligand L<sup>5</sup>

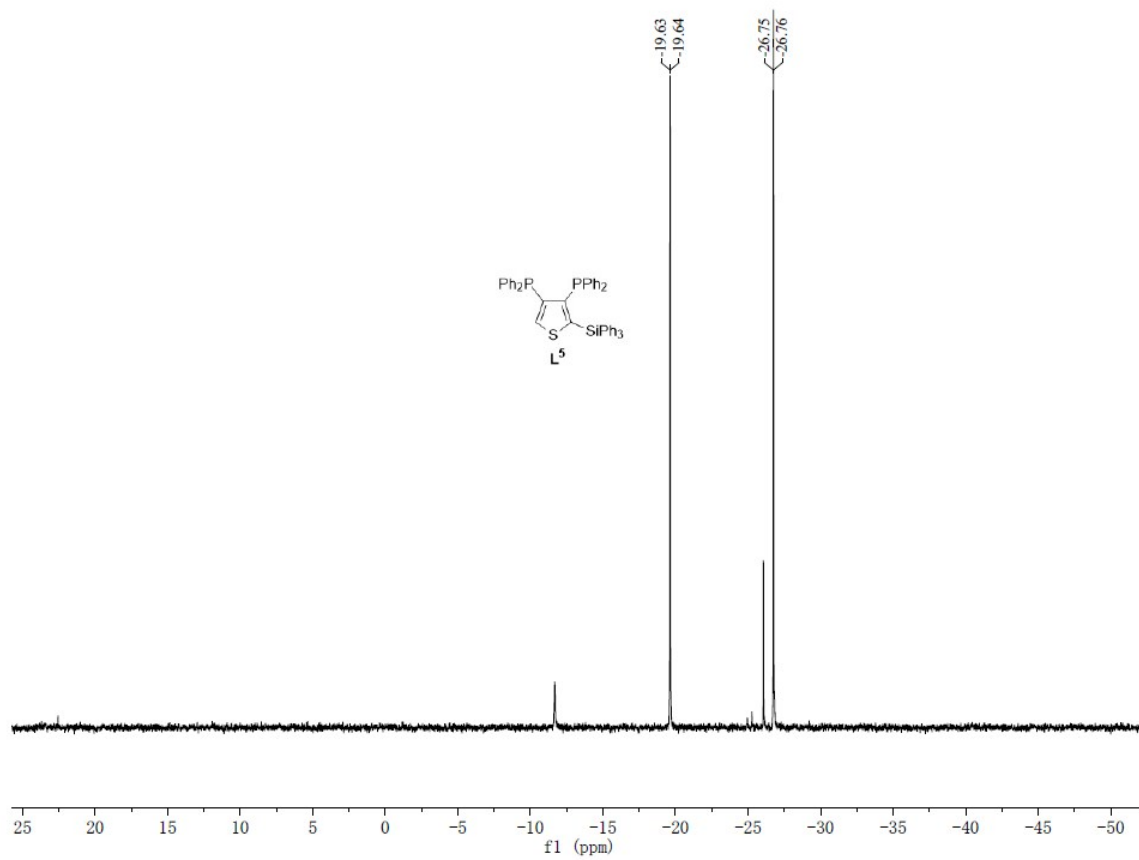

### <sup>1</sup>H NMR Spectrum of complex 1

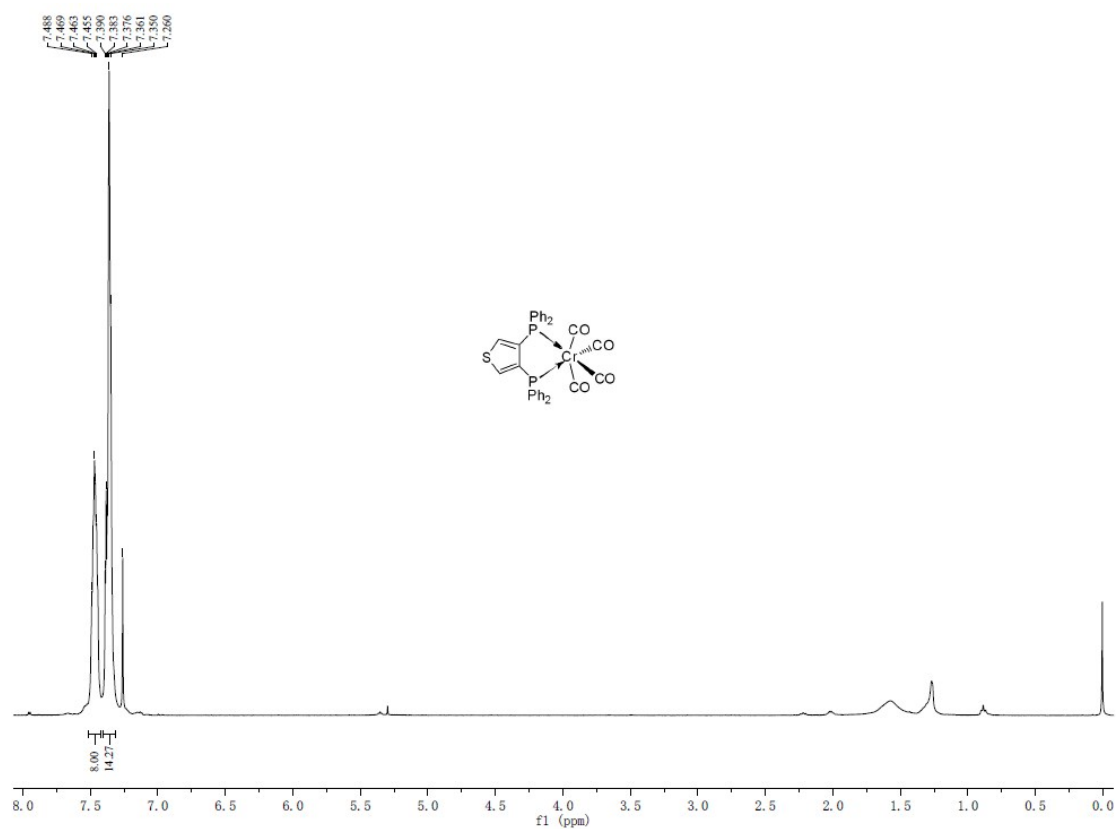

### <sup>13</sup>C NMR Spectrum of complex 1

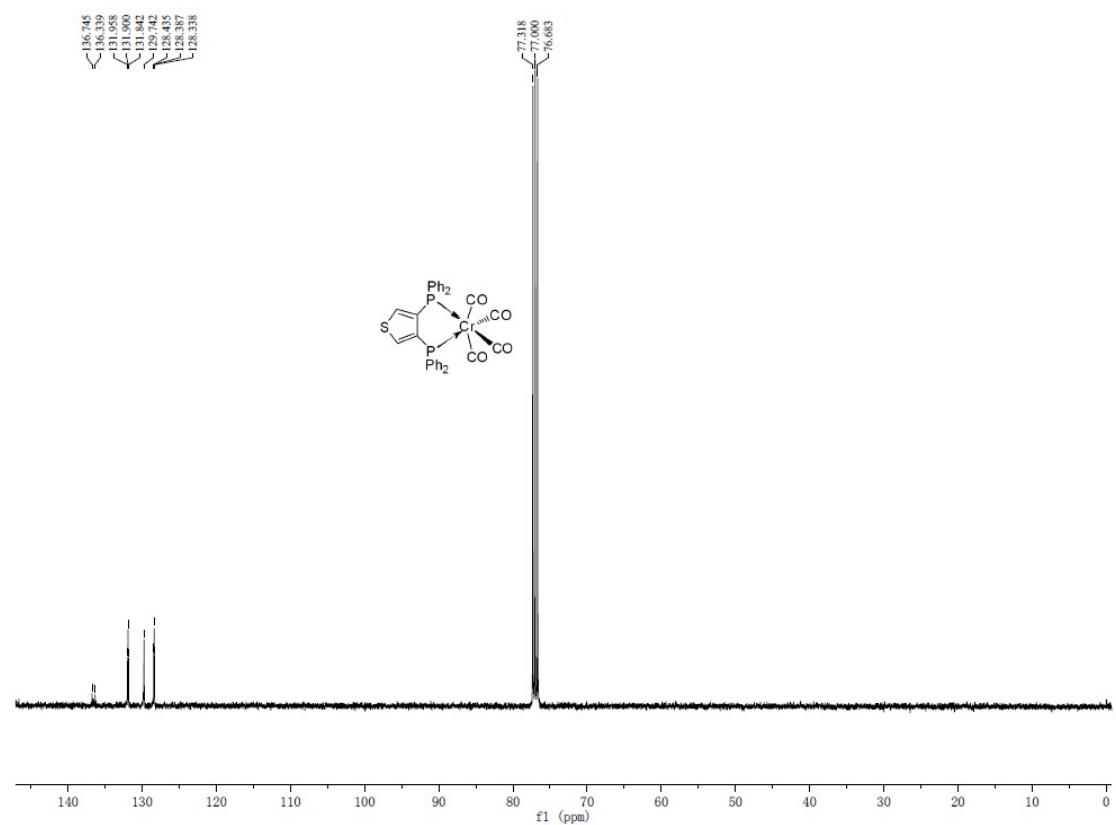

# <sup>31</sup>P NMR Spectrum of complex 1

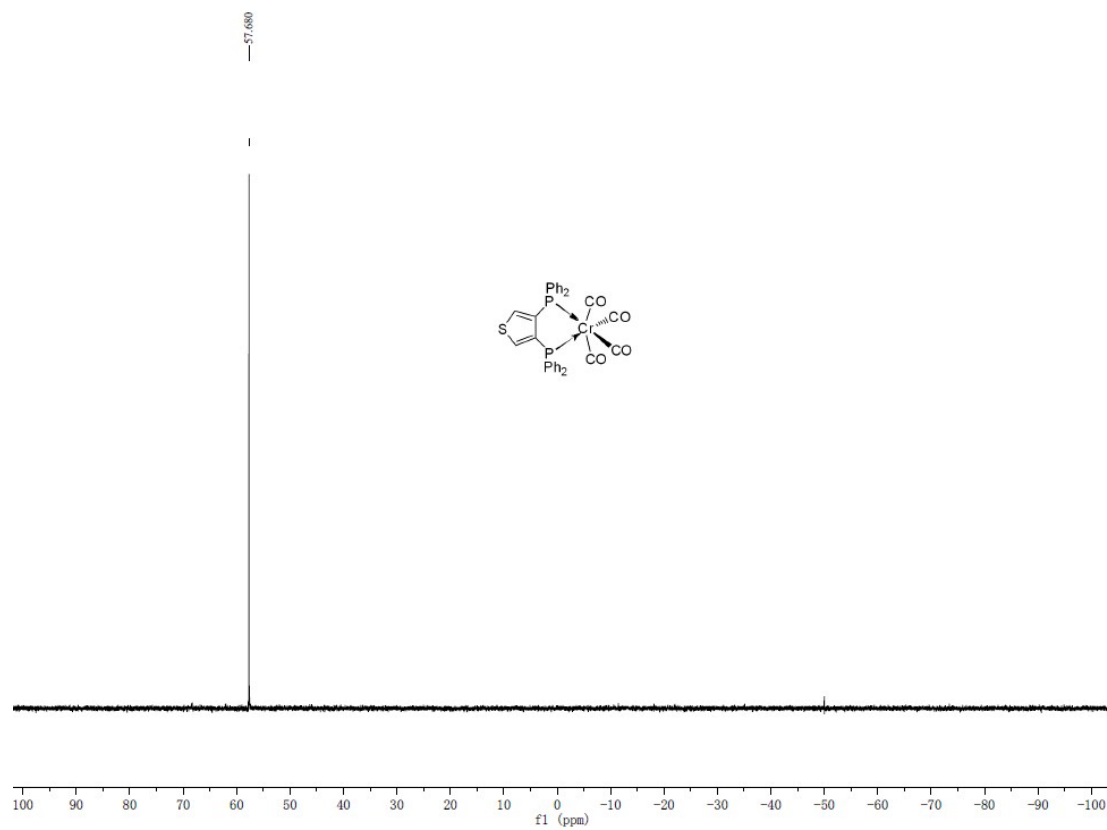

# <sup>1</sup>H NMR Spectrum of complex 2

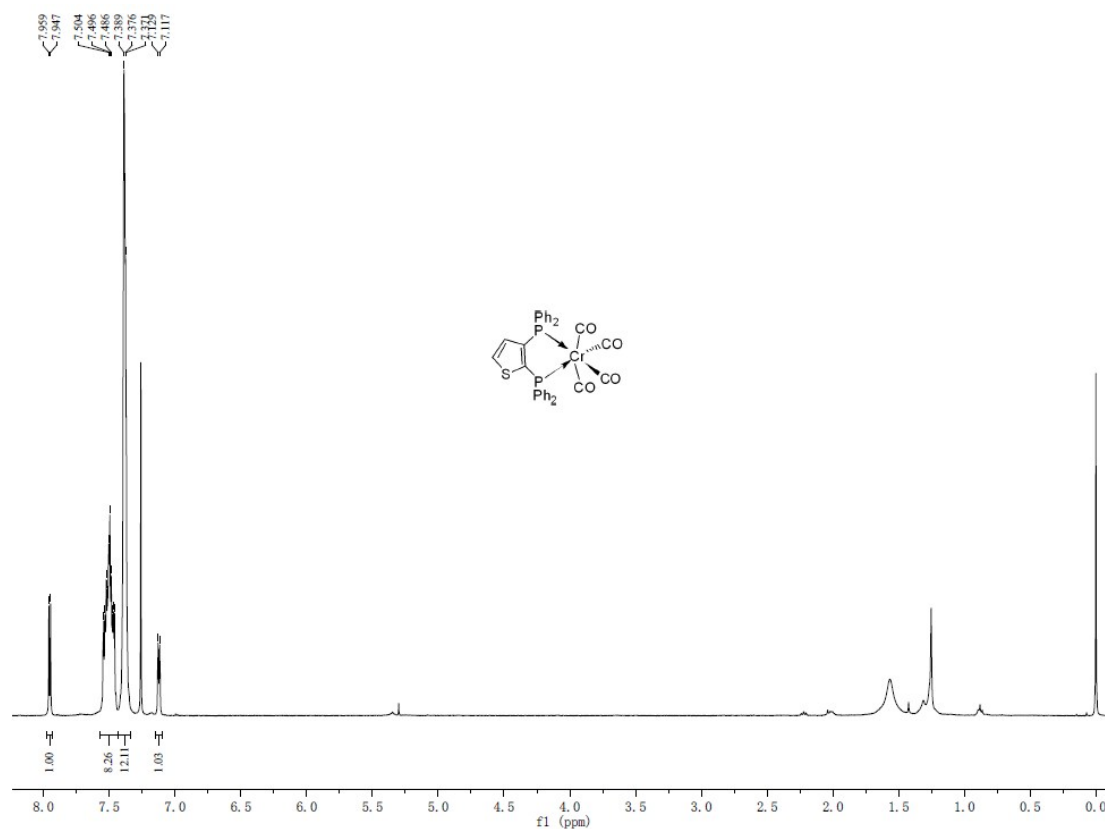

# <sup>13</sup>C NMR Spectrum of complex 2

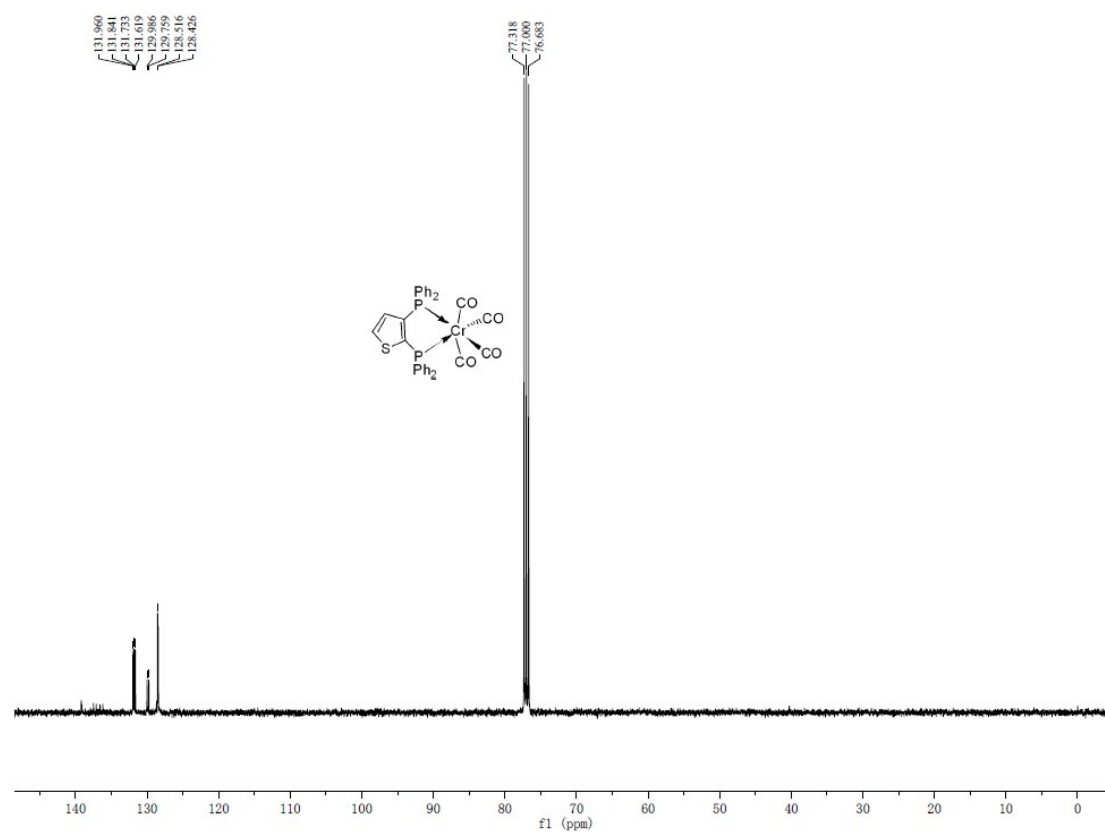

# <sup>31</sup>P NMR Spectrum of complex 2

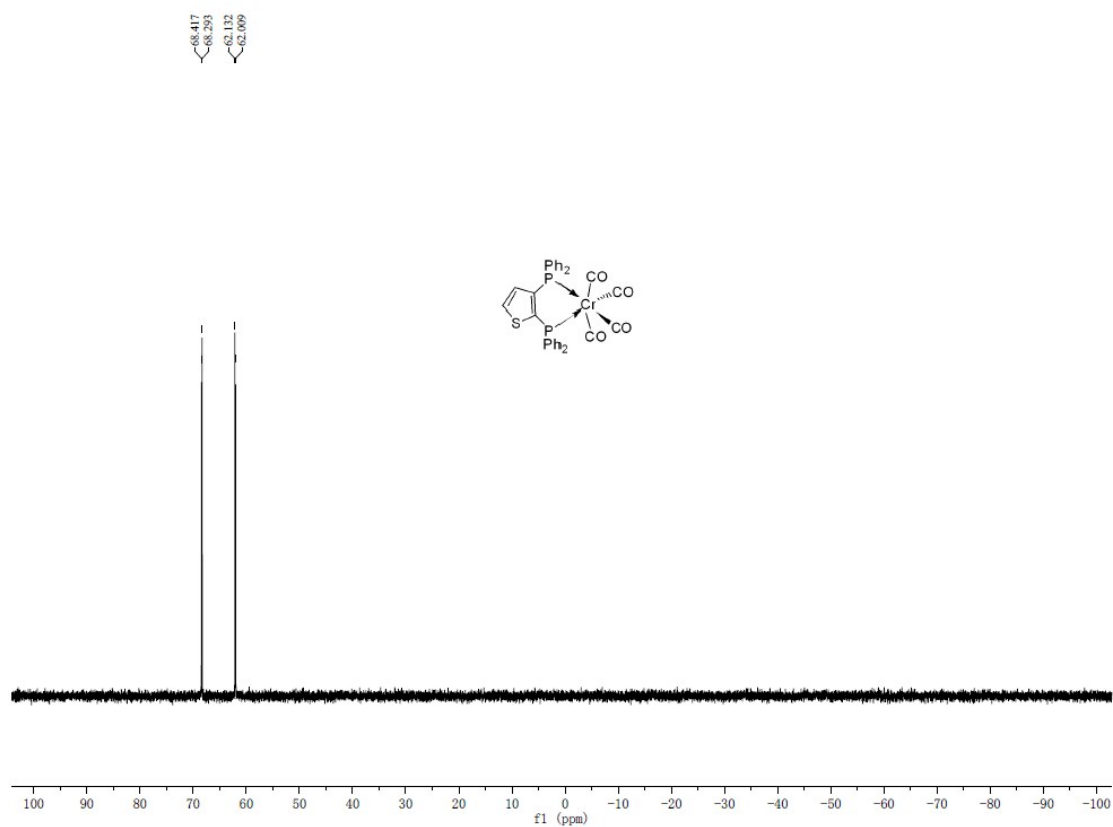



**X-Ray Crystallography.** Each crystal was mounted on a glass fiber. Crystallographic measurements were made on a Bruker Smart Apex 100 CCD area detector using graphite monochromated Mo-K $\alpha$  radiation ( $\lambda_{\text{Mo-K}\alpha} = 0.71073 \text{ \AA}$ ). The structures were solved by directed methods (SHELXS-97) and refined on  $F^2$  by full-matrix least squares (SHELX-97) using all unique data. All the calculations were carried out with the SHELXTL18 program.

Key details of the crystal and structure refinement data are summarized in Table S1. Further crystallographic details may be found in the respective CIF files, which were deposited at the Cambridge Crystallographic Data Centre, Cambridge, UK [CCDC 1538907 (**1**) and 1538906 (**2**)].

**Table S1.** Crystal Data, Data Collection, and Structure Refinement for **1** and **2**

|                                                                    | <b>1</b>                                                           | <b>2</b>                                                           |
|--------------------------------------------------------------------|--------------------------------------------------------------------|--------------------------------------------------------------------|
| Identification code                                                | a60106c                                                            | mo_60325ba                                                         |
| CCDC No.                                                           | 1538907                                                            | 1538906                                                            |
| Formula                                                            | C <sub>32</sub> H <sub>22</sub> Cr O <sub>4</sub> P <sub>2</sub> S | C <sub>32</sub> H <sub>22</sub> Cr O <sub>4</sub> P <sub>2</sub> S |
| Formula weight                                                     | 616.49                                                             | 616.49                                                             |
| <i>T</i> , K                                                       | 298(2) K                                                           | 173(2) K                                                           |
| crystal system                                                     | Orthorhombic                                                       | Orthorhombic                                                       |
| space group                                                        | P n m a                                                            | Pnma                                                               |
| <i>a</i> , Å                                                       | 16.801(7)                                                          | 16.833(5)                                                          |
| <i>b</i> , Å                                                       | 21.284(9)                                                          | 21.330(6)                                                          |
| <i>c</i> , Å                                                       | 7.993(4)                                                           | 7.869(2)                                                           |
| $\alpha$ , deg                                                     | 90°                                                                | 90°                                                                |
| $\beta$ , deg                                                      | 90°                                                                | 90°                                                                |
| $\gamma$ , deg                                                     | 90°                                                                | 90°                                                                |
| Volume, Å <sup>3</sup>                                             | 2858 (2)                                                           | 2825.3 (14)                                                        |
| <i>Z</i>                                                           | 4                                                                  | 4                                                                  |
| <i>D</i> <sub>calc</sub> , Mg / m <sup>3</sup>                     | 1.433                                                              | 1.449                                                              |
| absorption coefficient,                                            | 0.622                                                              | 0.629                                                              |
| F(000)                                                             | 1264                                                               | 1264                                                               |
| crystal size, mm                                                   | 0.250 x 0. 200 x 0.150                                             | 0.210 x 0.150 x 0.080                                              |
| 2 $\theta$ range, deg                                              | 1.914 to 26.997°                                                   | 1.909 to 27.070°                                                   |
| reflections                                                        | 10156                                                              | 17126                                                              |
| data / restraints /                                                | 3150 / 0 / 190                                                     | 3171/ 0 / 190                                                      |
| goodness of fit on F <sup>2</sup>                                  | 0.830                                                              | 1.008                                                              |
| final R indices [ <i>I</i> > 2 $\sigma$ ( <i>I</i> )] <sup>a</sup> | R1 = 0.0423,<br>wR2 = 0.0782                                       | R1 = 0.0443,<br>wR2 = 0.0982                                       |
| R indices (all data)                                               | R1 = 0.0816,<br>wR2 = 0.0829                                       | R1 = 0.0833,<br>wR2 = 0.1147                                       |
| lgst diff peak and hole,                                           | 0.547 and -0.390                                                   | 0.367 and -0.272                                                   |
